# Supplementary material for: Overestimation of closed-chamber soil CO 2 effluxes at low atmospheric turbulence
Source: Copernicus journal article supplement (doi:10.5194/bg-14-1603-2017), 2017-03-28
Supplement: Supplementary file 1 [file bg-14-1603-2017-supplement.pdf]

Supplement of Biogeosciences, 14, 1603–1616, 2017  
<http://www.biogeosciences.net/14/1603/2017/>  
doi:10.5194/bg-14-1603-2017-supplement  
© Author(s) 2017. CC Attribution 3.0 License.

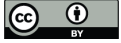

*Supplement of*

## **Overestimation of closed-chamber soil CO<sub>2</sub> effluxes at low atmospheric turbulence**

**Andreas Brændholt et al.**

*Correspondence to:* Andreas Brændholt (andbr@env.dtu.dk)

The copyright of individual parts of the supplement might differ from the CC-BY 3.0 licence.

## Information

The following document contains the results from the linearly and non-linearly calculated soil CO<sub>2</sub> effluxes at four different dead bands of 10, 20, 30 and 40 seconds.

Figure 1-8 show the seasonally averaged diurnal patterns of soil CO<sub>2</sub> effluxes at different friction velocity ( $u_*$ ) threshold values for effluxes calculated at a specific dead band and calculation method. These figures use the same template as Fig. 5 in the manuscript, and Fig. 2 (linearly calculated at dead band 20) is identical to Fig. 5 in the manuscript.

Fig. 9 shows the calculated annual soil CO<sub>2</sub> effluxes for each dead band and flux calculation method. It is an extended version of Fig. 7 in the manuscript.

10

15

20

## Linearly calculated soil CO<sub>2</sub> effluxes at 10 s dead band

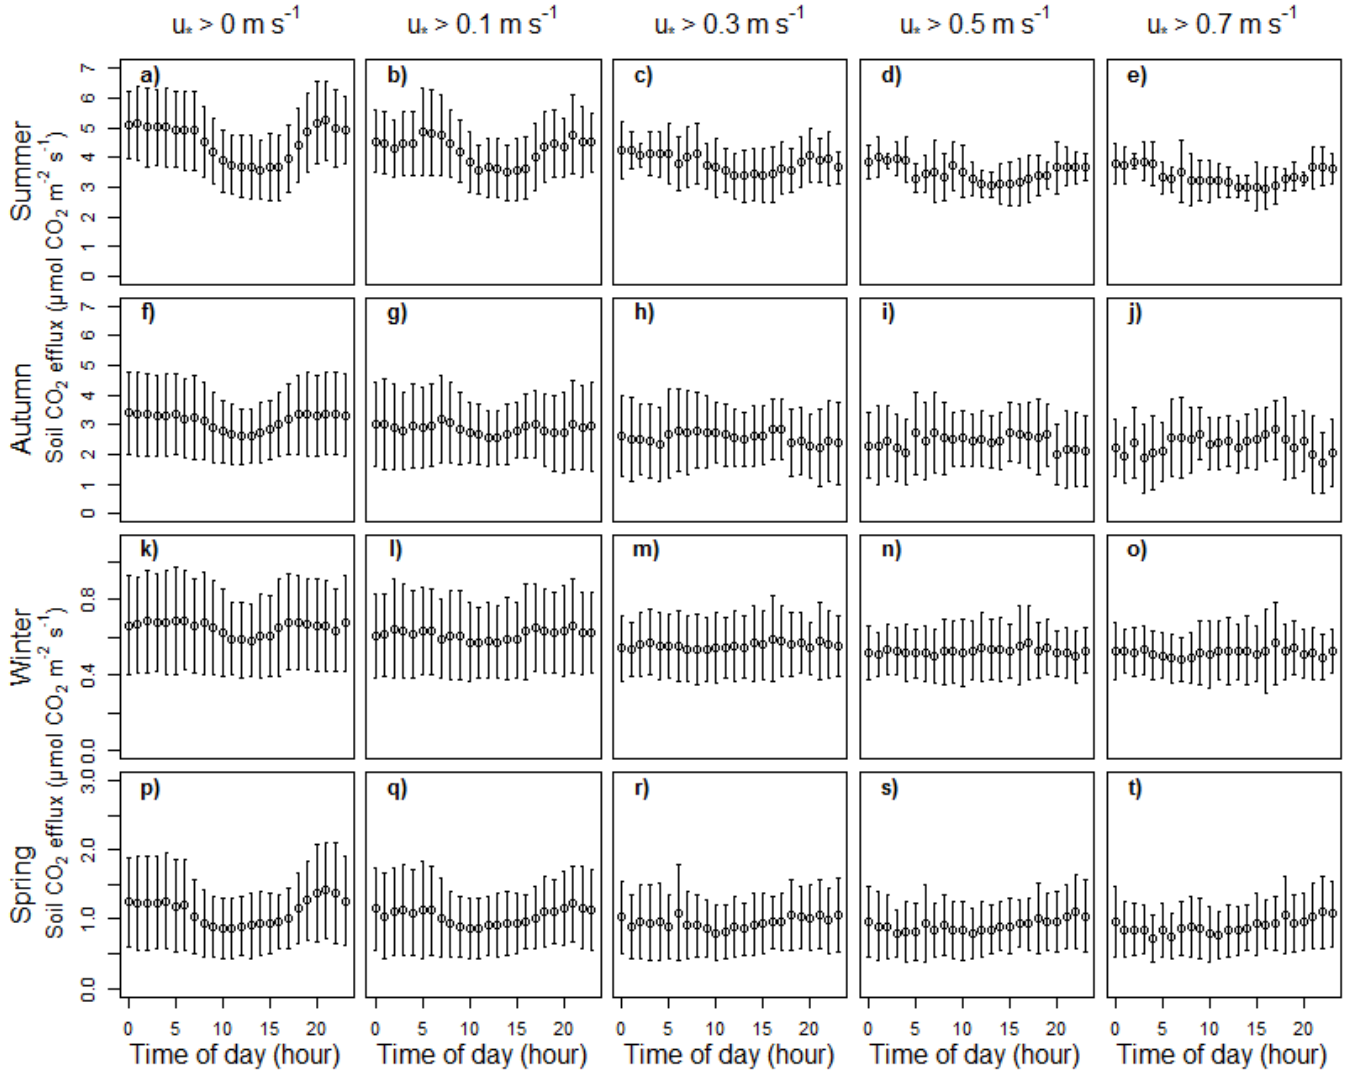

5 **Figure 1: Seasonally averaged diurnal patterns of soil CO<sub>2</sub> efflux ( $\pm$  standard deviation), at different friction velocity ( $u_*$ ) threshold values, measured by the eight automated chambers for each of the 4 seasons. Effluxes are linearly calculated at a dead band of 10 s. From the top, the four rows show the diurnal patterns for summer, autumn, winter and spring respectively. From the left, the five collars show the diurnal patterns for each season at no  $u_*$  filtering, a  $u_*$  threshold value of 0.1 m s<sup>-1</sup>, a  $u_*$  threshold value of 0.3 m s<sup>-1</sup>, a  $u_*$  threshold value of 0.5 m s<sup>-1</sup> and a  $u_*$  threshold value of 0.7 m s<sup>-1</sup>, respectively.**

Linearly calculated soil CO<sub>2</sub> effluxes at 20 s dead band

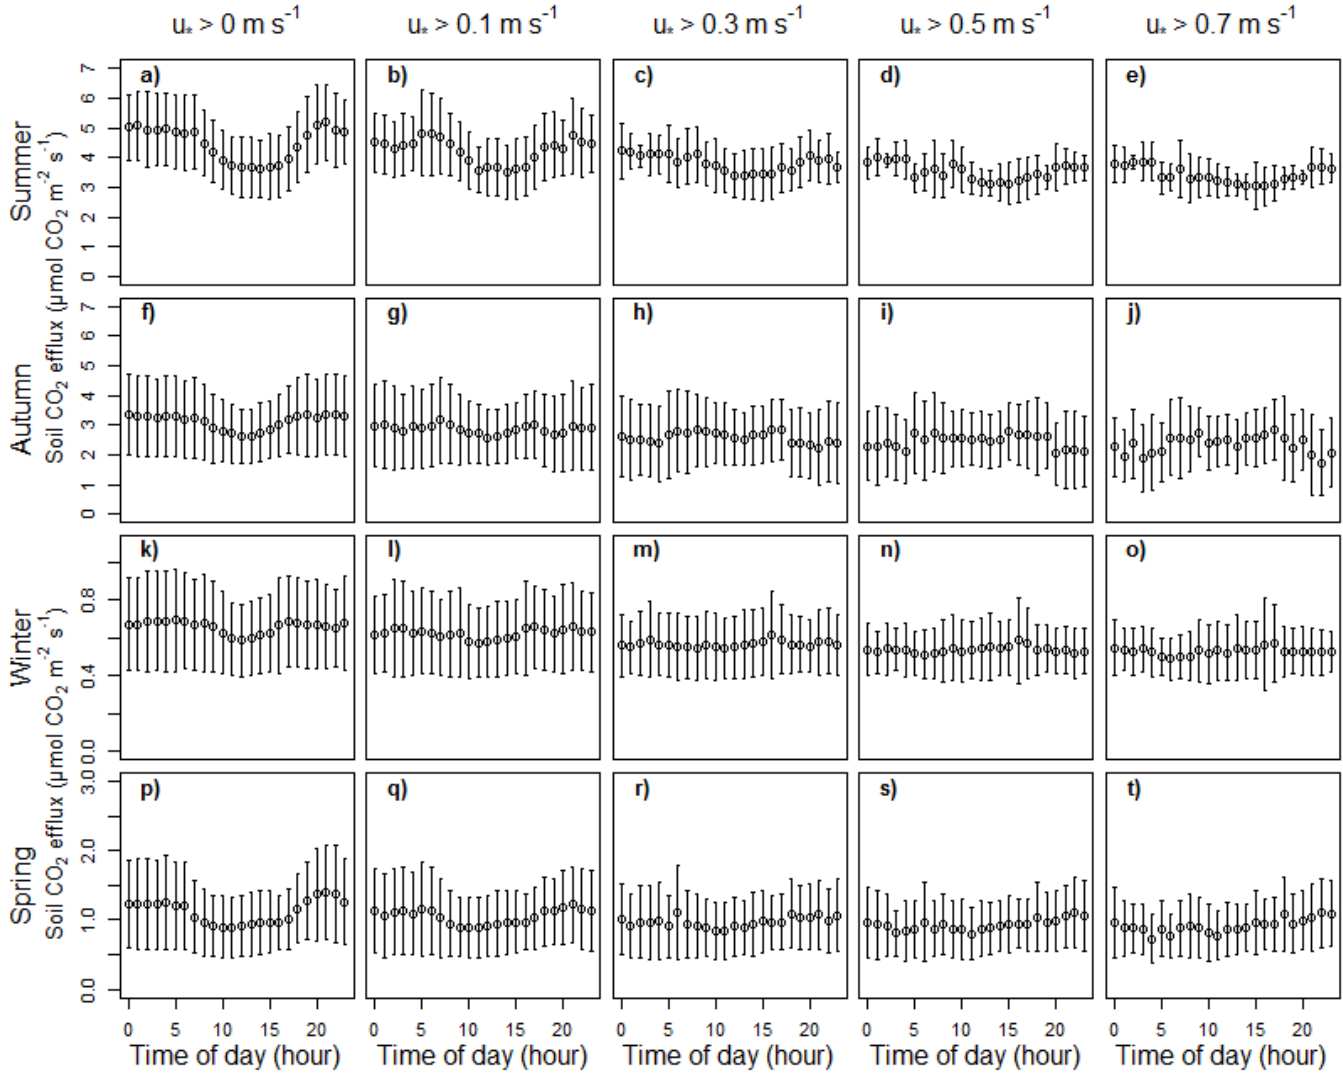

Figure 2: Seasonally averaged diurnal patterns of soil CO<sub>2</sub> efflux ( $\pm$  standard deviation), at different friction velocity ( $u_*$ ) threshold values, measured by the eight automated chambers for each of the 4 seasons. Effluxes are linearly calculated at a dead band of 20 s. From the top, the four rows show the diurnal patterns for summer, autumn, winter and spring respectively. From the left, the five collars show the diurnal patterns for each season at no  $u_*$  filtering, a  $u_*$  threshold value of 0.1 m s<sup>-1</sup>, a  $u_*$  threshold value of 0.3 m s<sup>-1</sup>, a  $u_*$  threshold value of 0.5 m s<sup>-1</sup> and a  $u_*$  threshold value of 0.7 m s<sup>-1</sup>, respectively.

5

Linearly calculated soil CO<sub>2</sub> effluxes at 30 s dead band

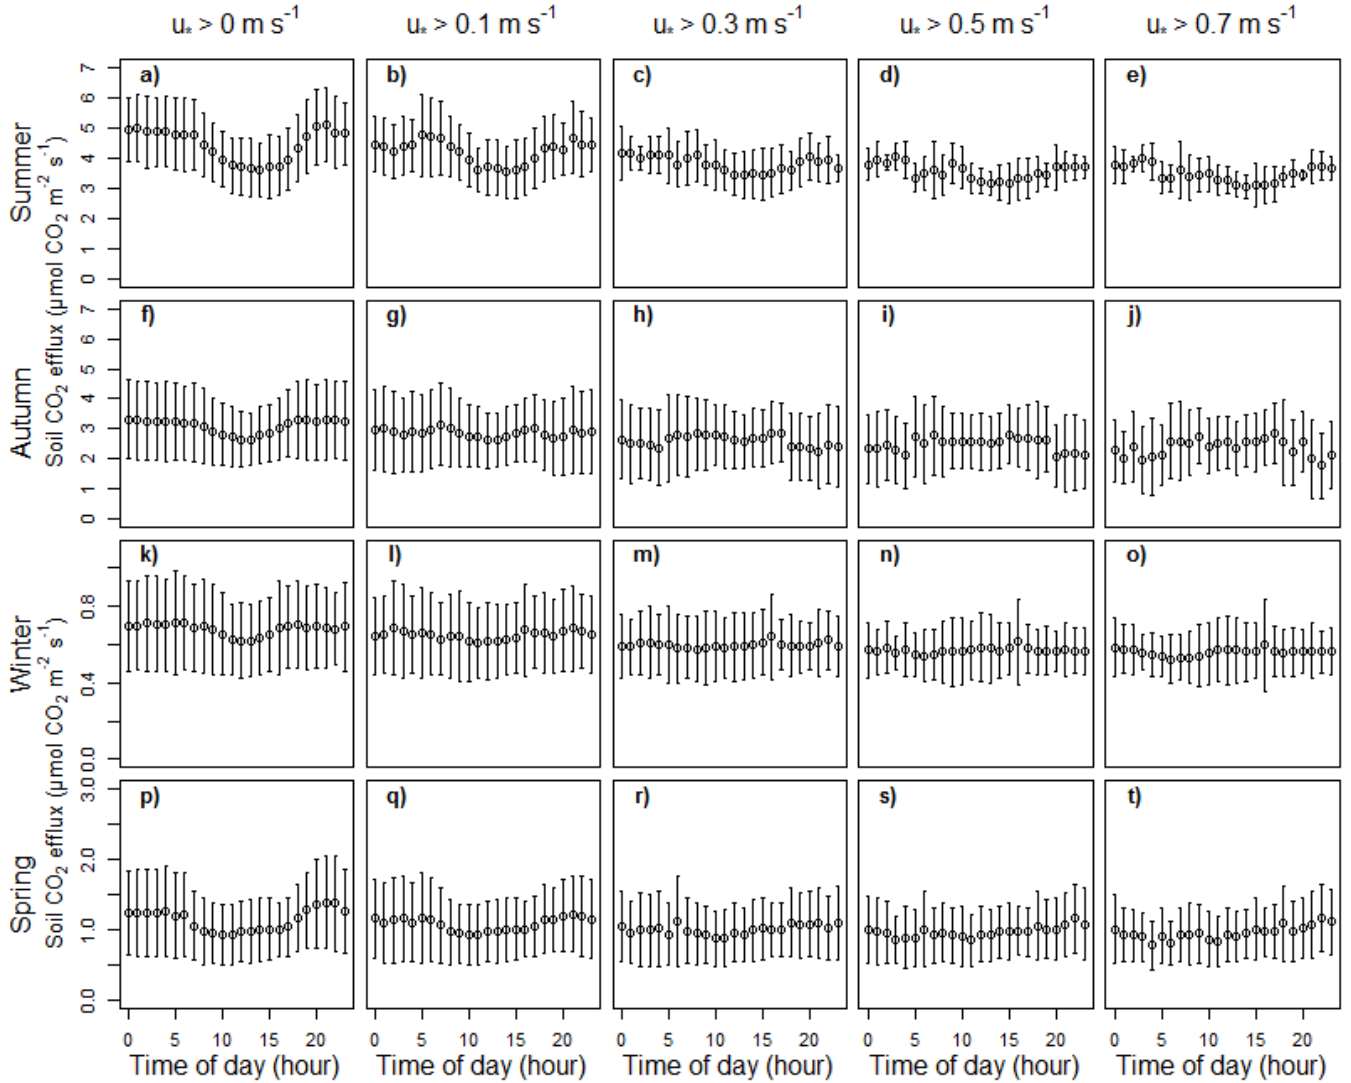

Figure 3: Seasonally averaged diurnal patterns of soil CO<sub>2</sub> efflux ( $\pm$  standard deviation), at different friction velocity ( $u_*$ ) threshold values, measured by the eight automated chambers for each of the 4 seasons. Effluxes are linearly calculated at a dead band of 30 s. From the top, the four rows show the diurnal patterns for summer, autumn, winter and spring respectively. From the left, the five collars show the diurnal patterns for each season at no  $u_*$  filtering, a  $u_*$  threshold value of 0.1 m s<sup>-1</sup>, a  $u_*$  threshold value of 0.3 m s<sup>-1</sup>, a  $u_*$  threshold value of 0.5 m s<sup>-1</sup> and a  $u_*$  threshold value of 0.7 m s<sup>-1</sup>, respectively.

5

10

Linearly calculated soil CO<sub>2</sub> effluxes at 40 s dead band

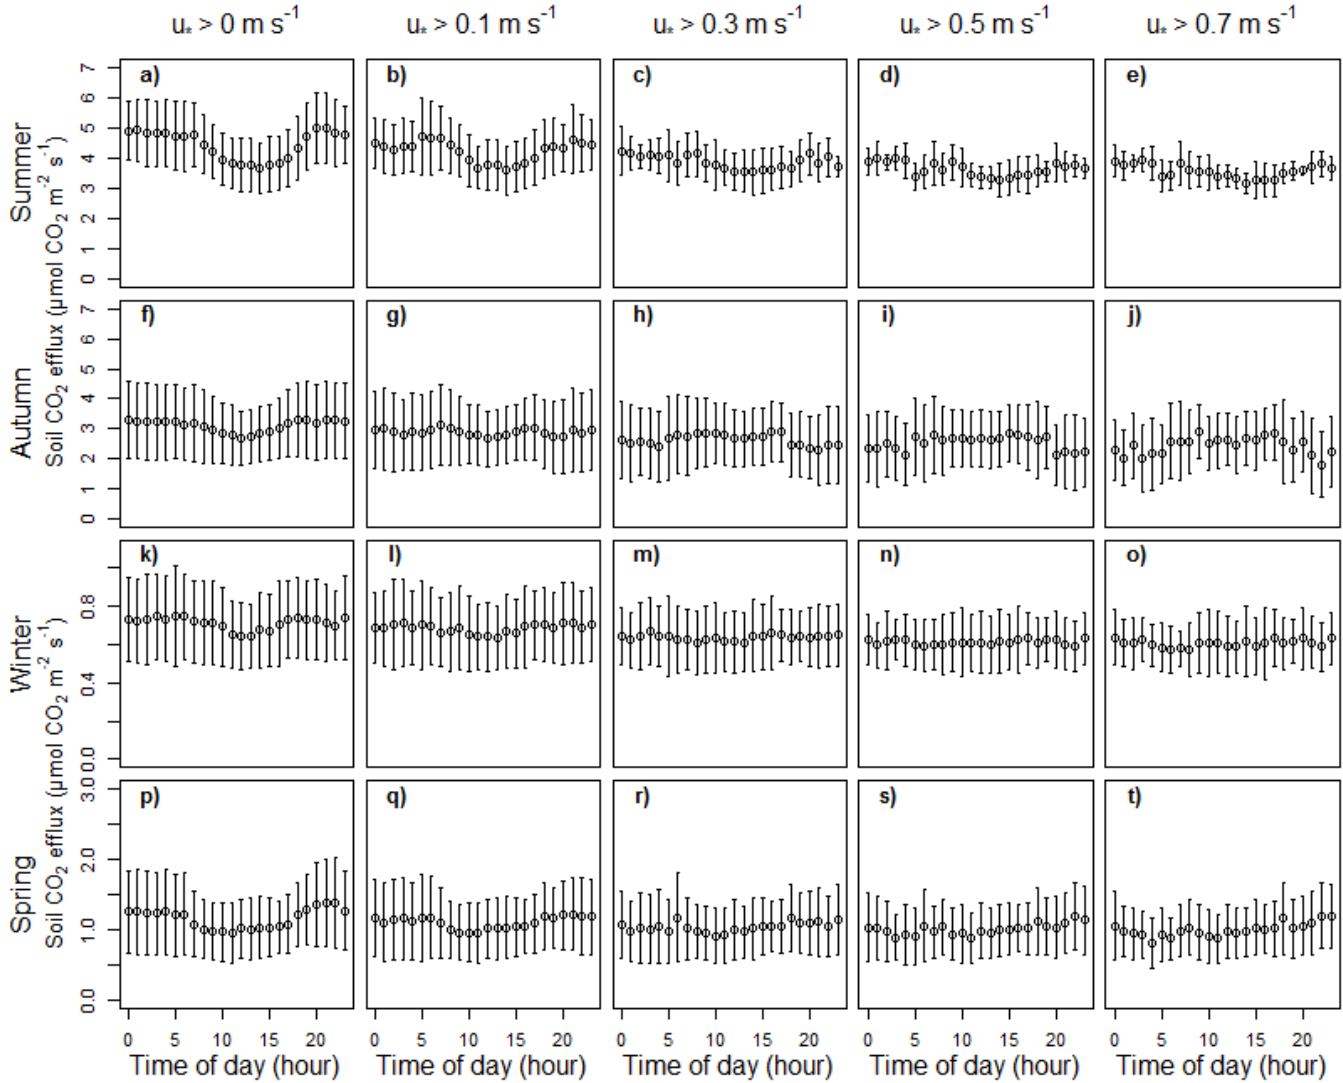

Figure 4: Seasonally averaged diurnal patterns of soil CO<sub>2</sub> efflux ( $\pm$  standard deviation), at different friction velocity ( $u_*$ ) threshold values, measured by the eight automated chambers for each of the 4 seasons. Effluxes are linearly calculated at a dead band of 40 s. From the top, the four rows show the diurnal patterns for summer, autumn, winter and spring respectively. From the left, the five collars show the diurnal patterns for each season at no  $u_*$  filtering, a  $u_*$  threshold value of 0.1 m s<sup>-1</sup>, a  $u_*$  threshold value of 0.3 m s<sup>-1</sup>, a  $u_*$  threshold value of 0.5 m s<sup>-1</sup> and a  $u_*$  threshold value of 0.7 m s<sup>-1</sup>, respectively.

5

10

### Non-linearly calculated soil CO<sub>2</sub> effluxes at 10 s dead band

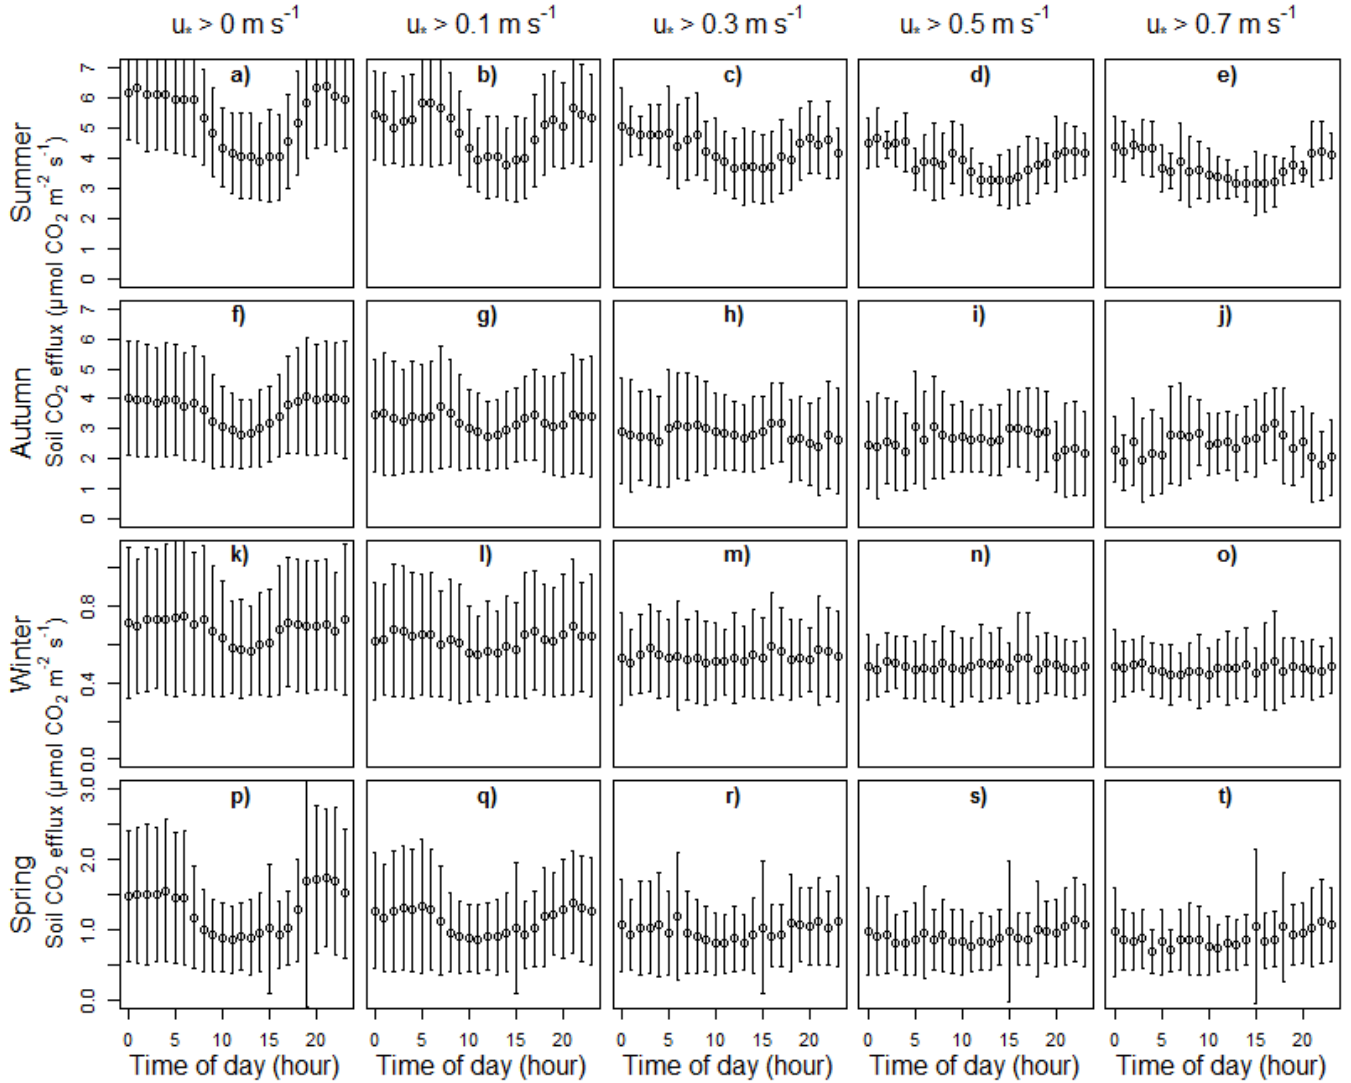

Figure 5: Seasonally averaged diurnal patterns of soil CO<sub>2</sub> efflux ( $\pm$  standard deviation), at different friction velocity ( $u_*$ ) threshold values, measured by the eight automated chambers for each of the 4 seasons. Effluxes are non-linearly calculated at a dead band of 10 s. From the top, the four rows show the diurnal patterns for summer, autumn, winter and spring respectively. From the left, the five collars show the diurnal patterns for each season at no  $u_*$  filtering, a  $u_*$  threshold value of 0.1 m s<sup>-1</sup>, a  $u_*$  threshold value of 0.3 m s<sup>-1</sup>, a  $u_*$  threshold value of 0.5 m s<sup>-1</sup> and a  $u_*$  threshold value of 0.7 m s<sup>-1</sup>, respectively.

5

10

### Non-linearly calculated soil CO<sub>2</sub> effluxes at 20 s dead band

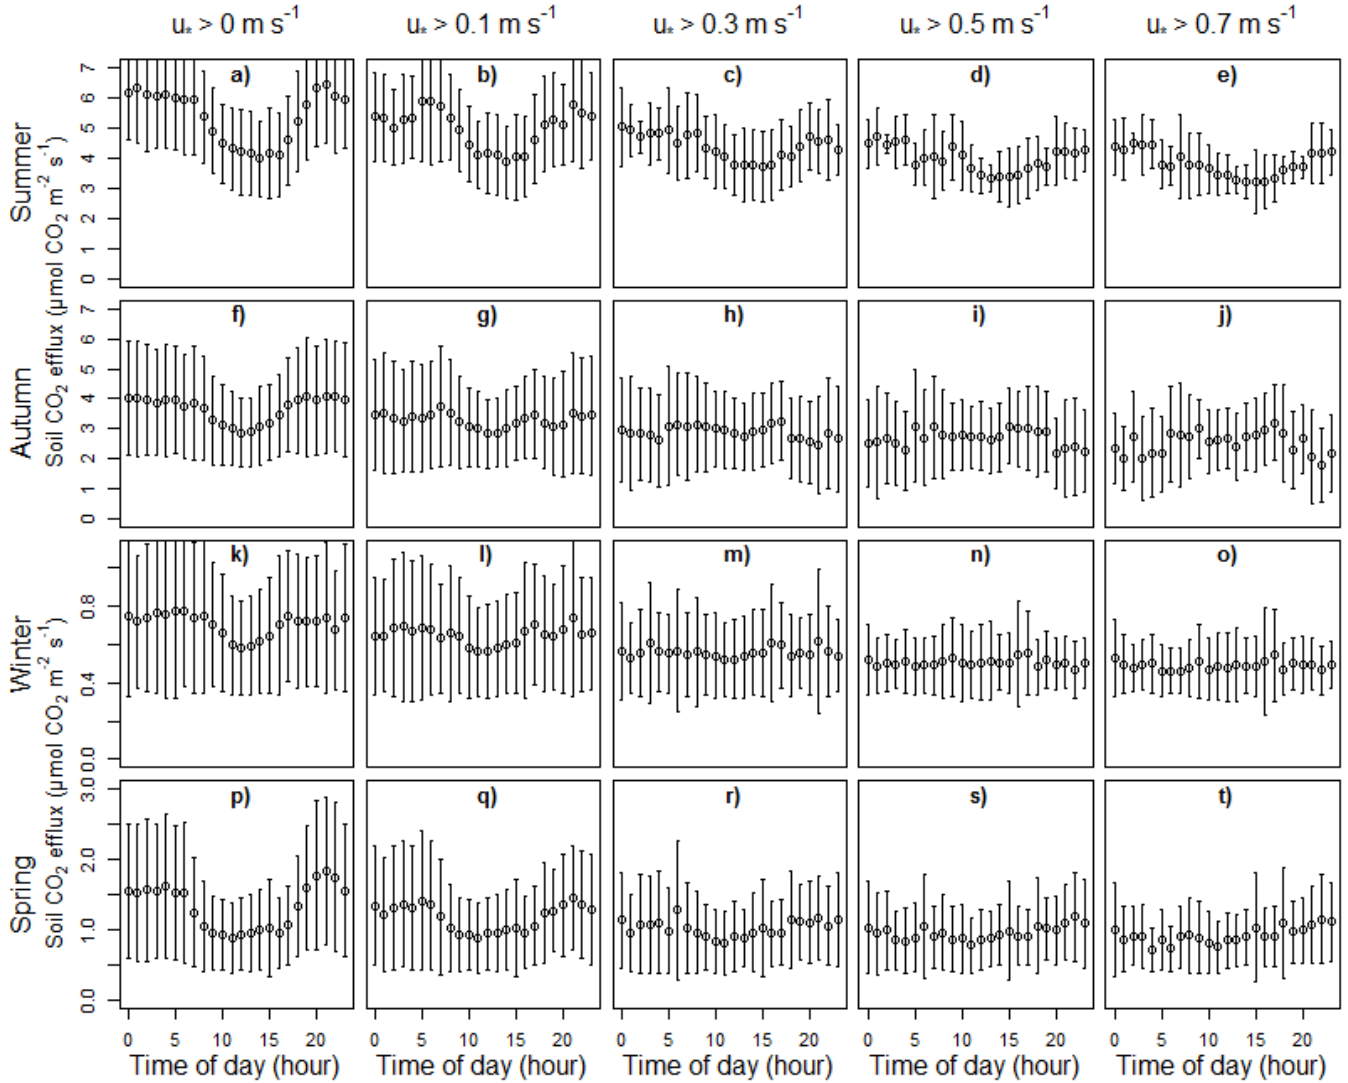

**Figure 6: Seasonally averaged diurnal patterns of soil CO<sub>2</sub> efflux ( $\pm$  standard deviation), at different friction velocity ( $u_*$ ) threshold values, measured by the eight automated chambers for each of the 4 seasons. Effluxes are non-linearly calculated at a dead band of 20 s. From the top, the four rows show the diurnal patterns for summer, autumn, winter and spring respectively. From the left, the five collars show the diurnal patterns for each season at no  $u_*$  filtering, a  $u_*$  threshold value of 0.1 m s<sup>-1</sup>, a  $u_*$  threshold value of 0.3 m s<sup>-1</sup>, a  $u_*$  threshold value of 0.5 m s<sup>-1</sup> and a  $u_*$  threshold value of 0.7 m s<sup>-1</sup>, respectively.**



### Non-linearly calculated soil CO<sub>2</sub> effluxes at 30 s dead band

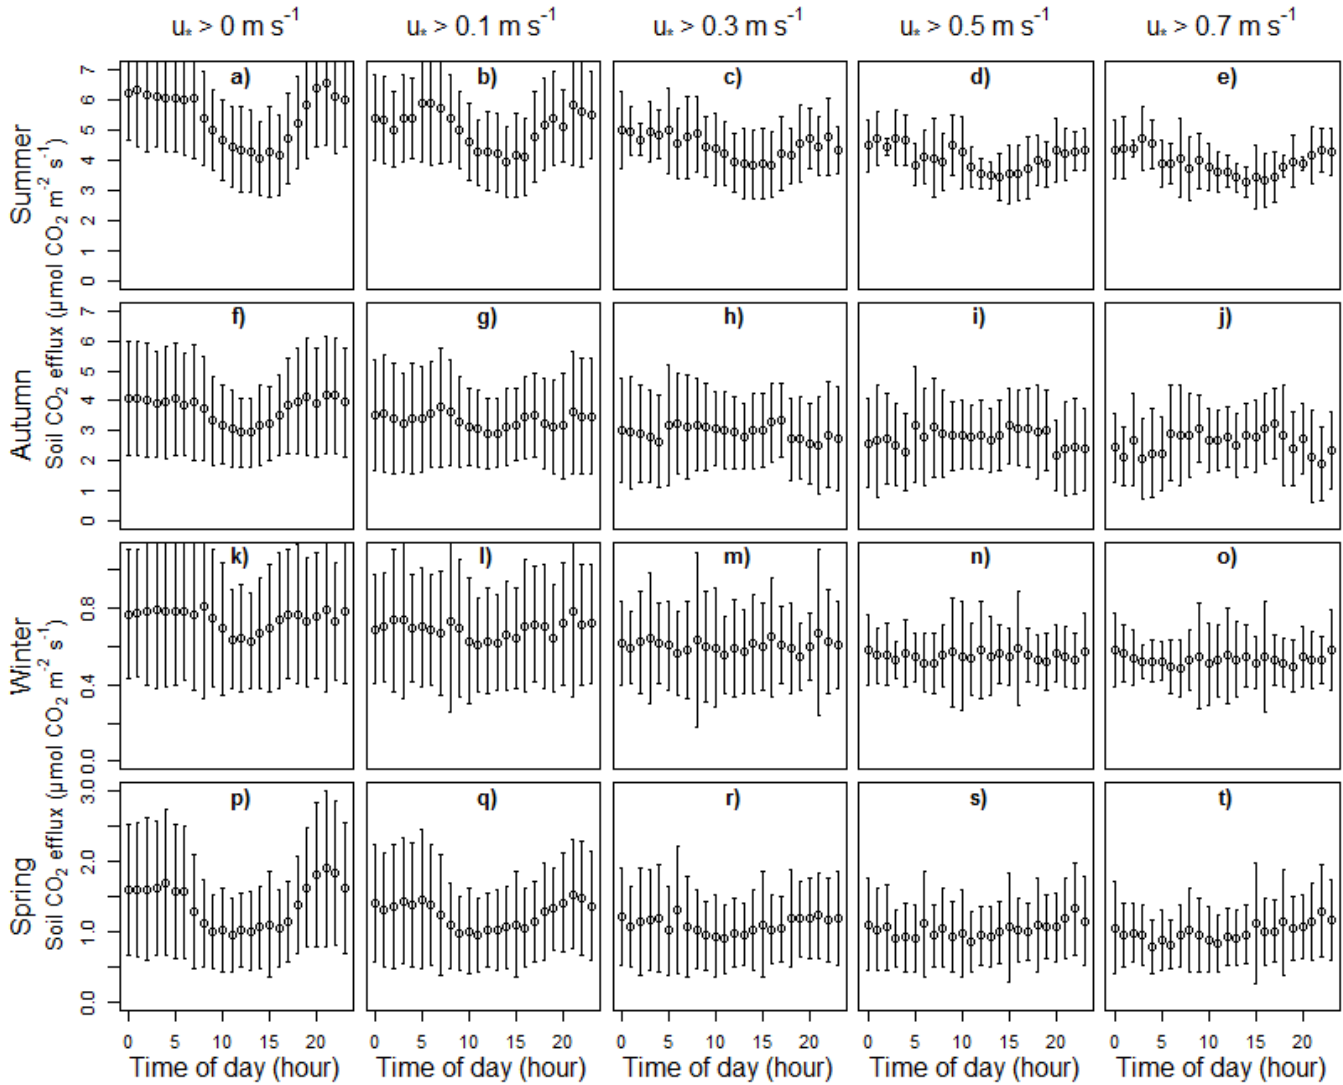

Figure 7: Seasonally averaged diurnal patterns of soil CO<sub>2</sub> efflux ( $\pm$  standard deviation), at different friction velocity ( $u_*$ ) threshold values, measured by the eight automated chambers for each of the 4 seasons. Effluxes are non-linearly calculated at a dead band of 30 s. From the top, the four rows show the diurnal patterns for summer, autumn, winter and spring respectively. From the left, the five collars show the diurnal patterns for each season at no  $u_*$  filtering, a  $u_*$  threshold value of 0.1 m s<sup>-1</sup>, a  $u_*$  threshold value of 0.3 m s<sup>-1</sup>, a  $u_*$  threshold value of 0.5 m s<sup>-1</sup> and a  $u_*$  threshold value of 0.7 m s<sup>-1</sup>, respectively.

### Non-linearly calculated soil CO<sub>2</sub> effluxes at 40 s dead band

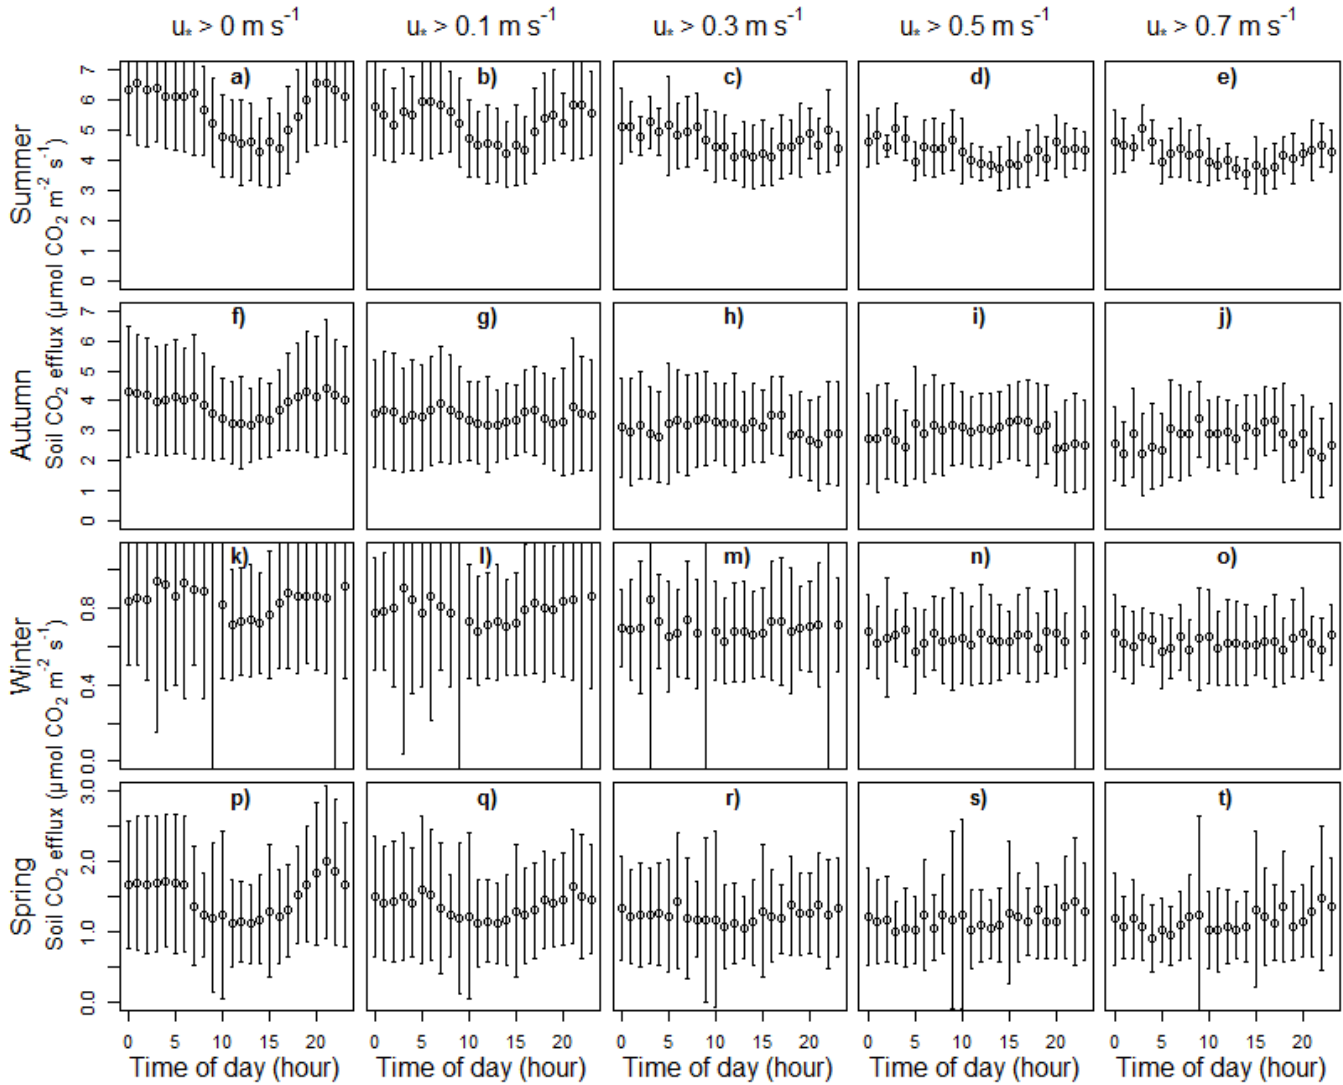

Figure 8: Seasonally averaged diurnal patterns of soil CO<sub>2</sub> efflux ( $\pm$  standard deviation), at different friction velocity ( $u_*$ ) threshold values, measured by the eight automated chambers for each of the 4 seasons. Effluxes are non-linearly calculated at a dead band of 40 s. From the top, the four rows show the diurnal patterns for summer, autumn, winter and spring respectively. From the left, the five collars show the diurnal patterns for each season at no  $u_*$  filtering, a  $u_*$  threshold value of 0.1 m s<sup>-1</sup>, a  $u_*$  threshold value of 0.3 m s<sup>-1</sup>, a  $u_*$  threshold value of 0.5 m s<sup>-1</sup> and a  $u_*$  threshold value of 0.7 m s<sup>-1</sup>, respectively.

5

10

## Calculated annual soil CO<sub>2</sub> effluxes

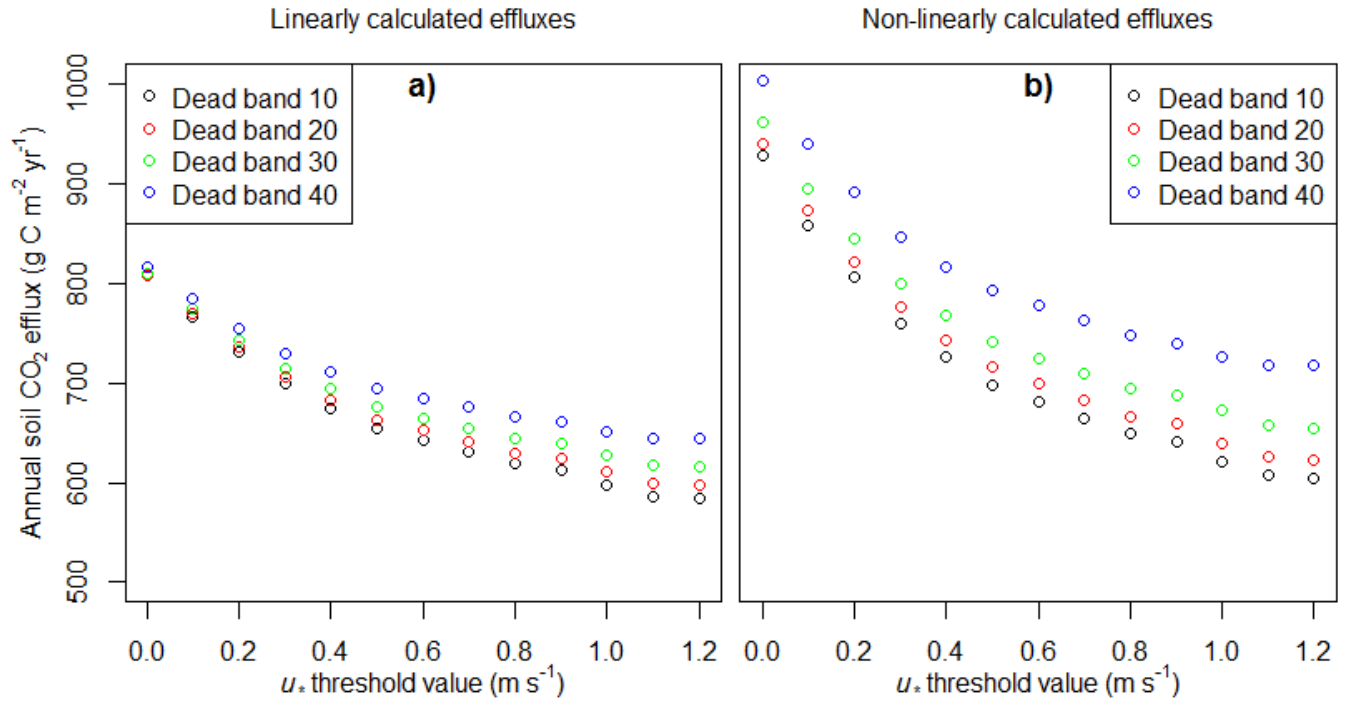

Figure 9: Calculated annual soil CO<sub>2</sub> effluxes in response to increasing the friction velocity ( $u_*$ ) threshold values for the automated chamber measurements during the one year campaign. (a) shows annual soil CO<sub>2</sub> effluxes for the linearly calculated effluxes at four different dead bands. (b) shows annual soil CO<sub>2</sub> effluxes for the non-linearly calculated effluxes at four different dead bands.
